# Supplementary material for: The Piezoresponse in WO3 Thin Films Due to N2-Filled Nanovoids Enrichment by Atom Probe Tomography
Source: MDPI journal article supplement (doi:10.3390/ma16041387), 2023-02-07
Supplement: s1 [file s1]

# The piezoresponse in WO<sub>3</sub> thin films due to N<sub>2</sub>-filled nanovoids enrichment by Atom Probe Tomography

## Supplemental Material 1

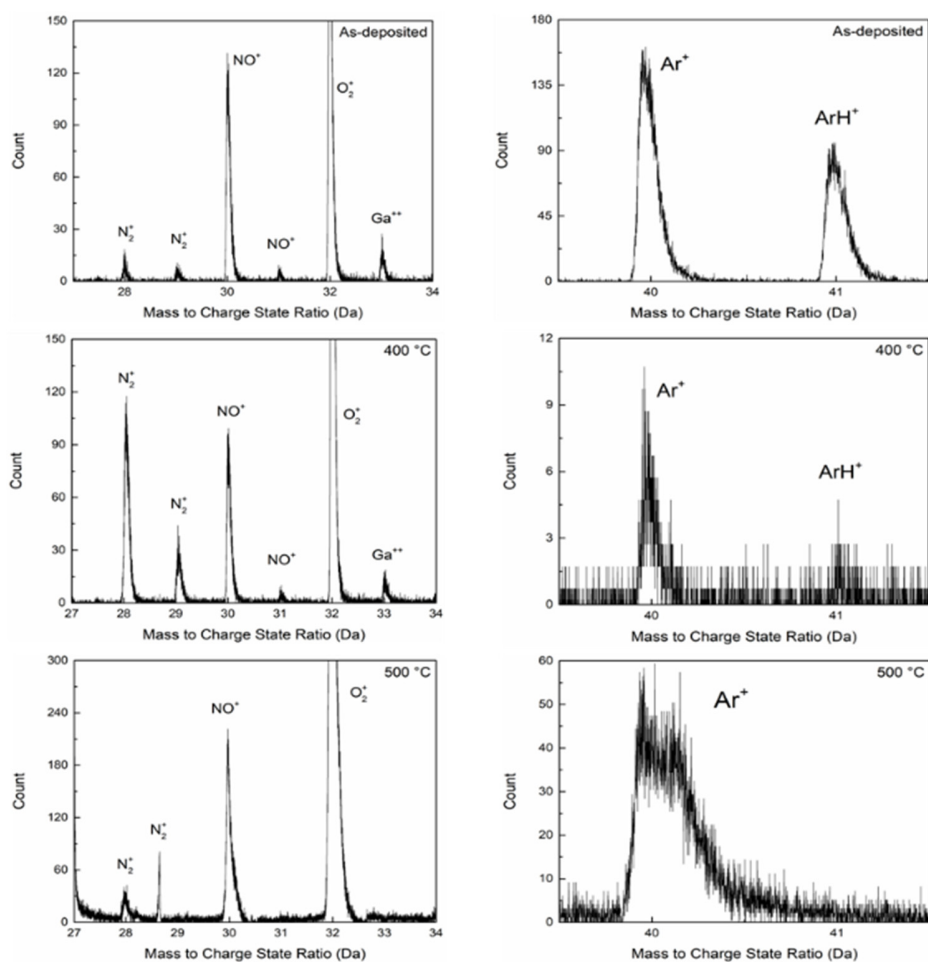

**Figure S1.** Mass spectra showing Ar and N-species content in as deposited, annealed at 400 °C and 500 °C WO<sub>3</sub> thin films.

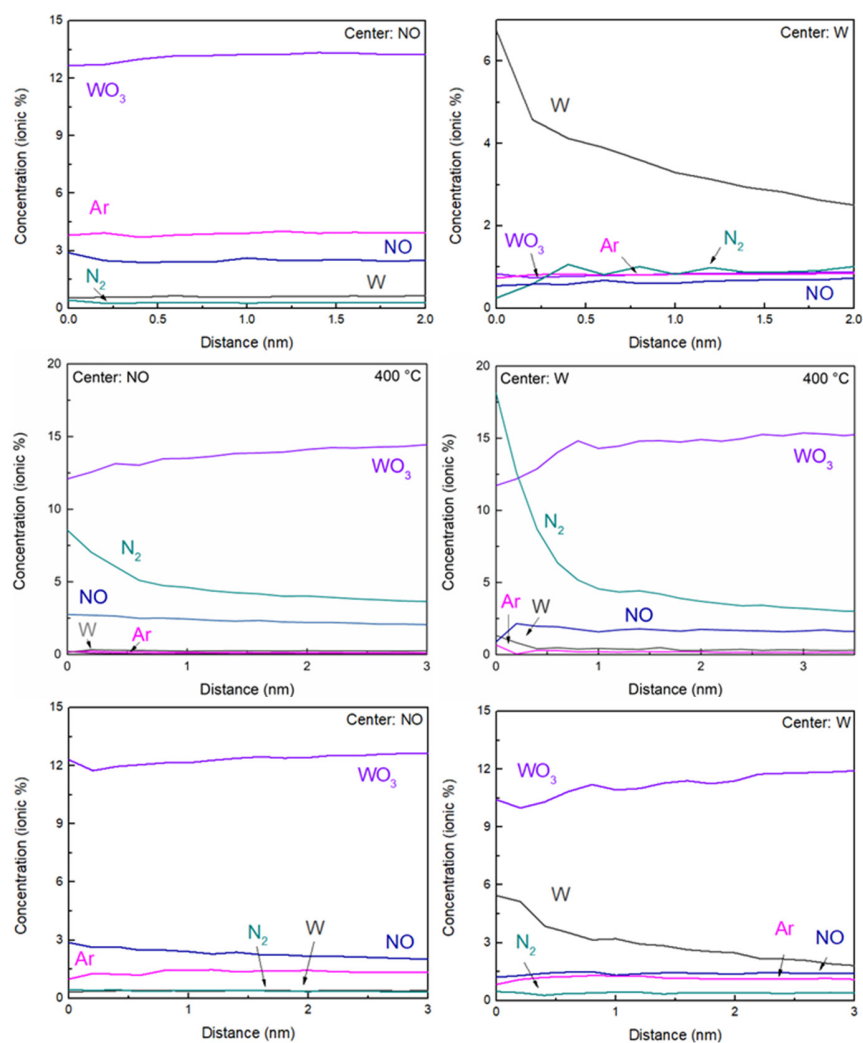

**Figure S2.** Radial distribution function with NO and W center ions.

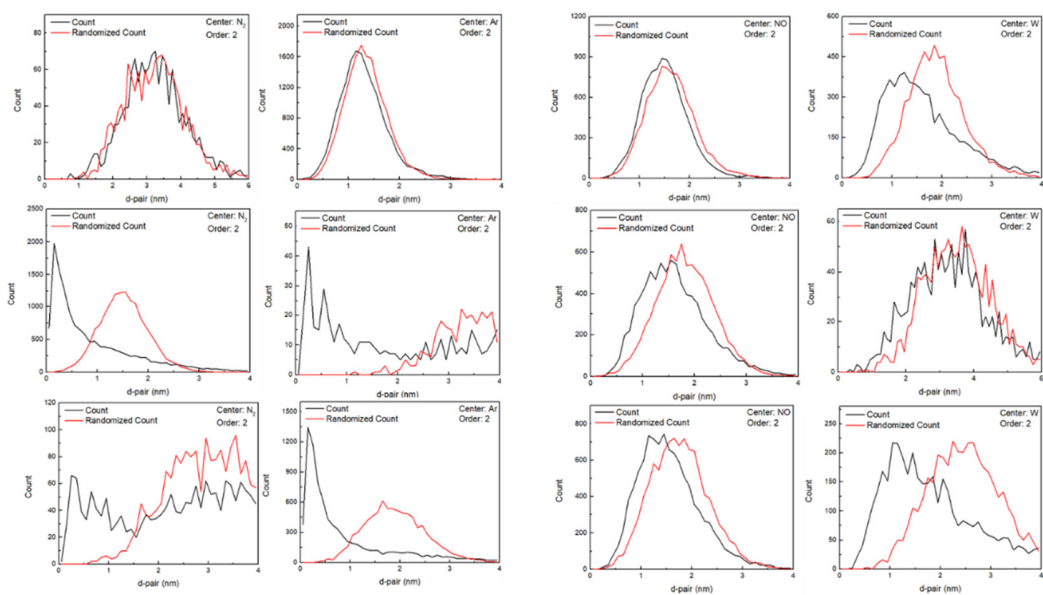

**Figure S3.** Nearest neighbor distribution for  $\text{WO}_3$  thin films as deposited, annealed at 400 °C and 500 °C.

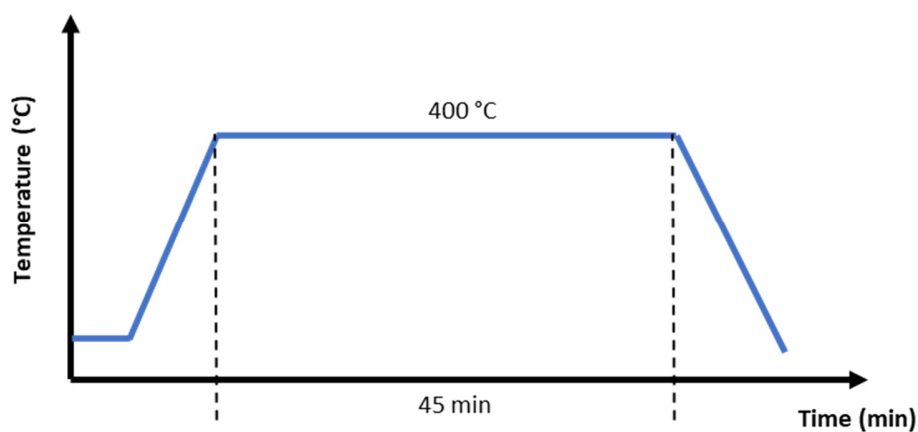

**Figure S4.** Annealing profile used for  $\text{WO}_3$  thin film processing.

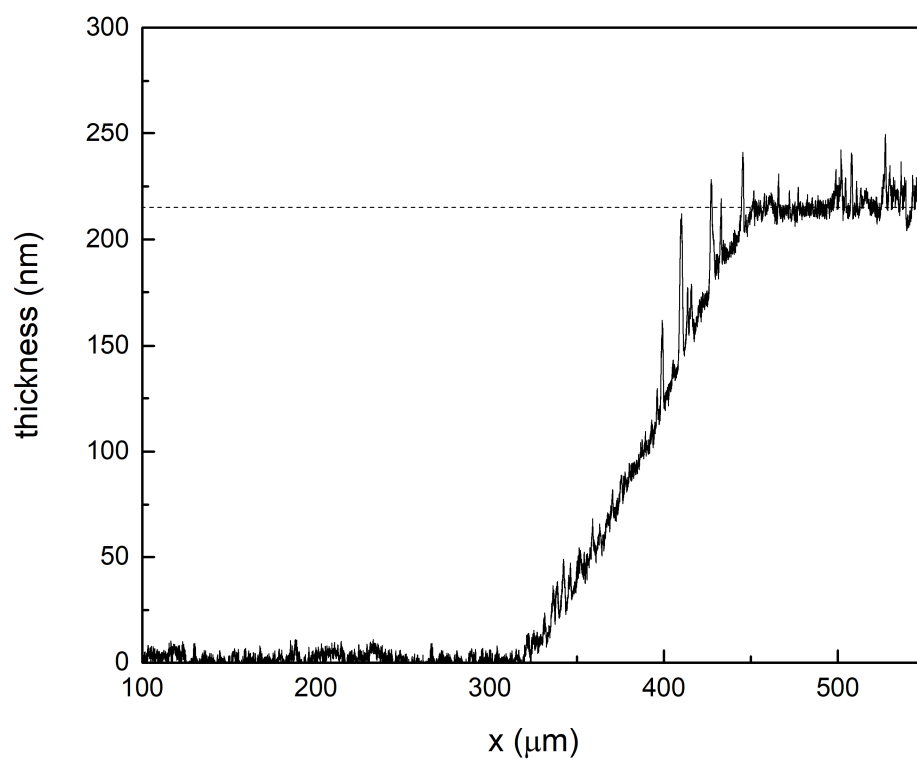

**Figure S5.** Profilometry to measure film thickness of WO<sub>3</sub>.

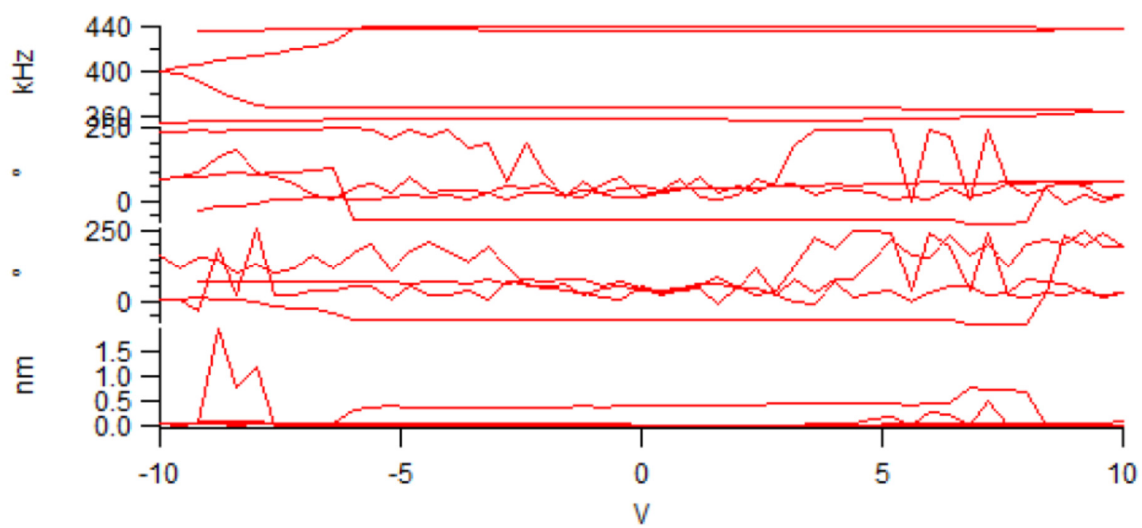

**Figure S6.** PFM off-field measurement of WO<sub>3</sub> – 500°C thin film indicating no piezoresponse.

a) As deposited  $\text{WO}_3$

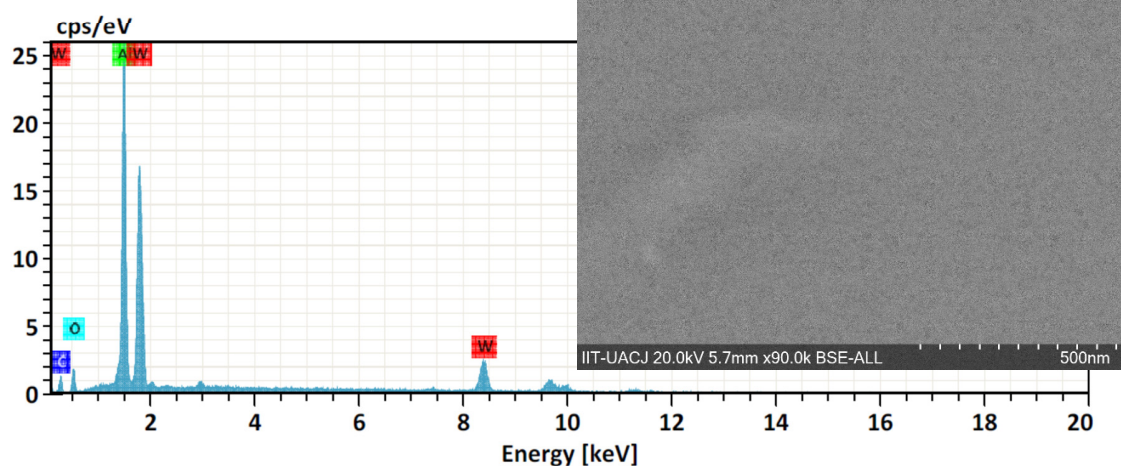

b)  $\text{WO}_3$  - 400 °C

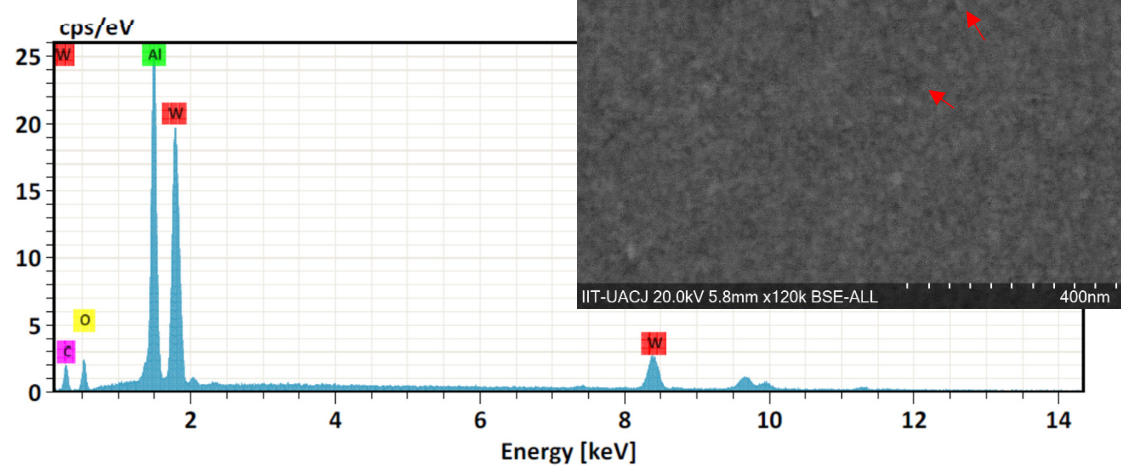

c)  $\text{WO}_3$  - 500 °C

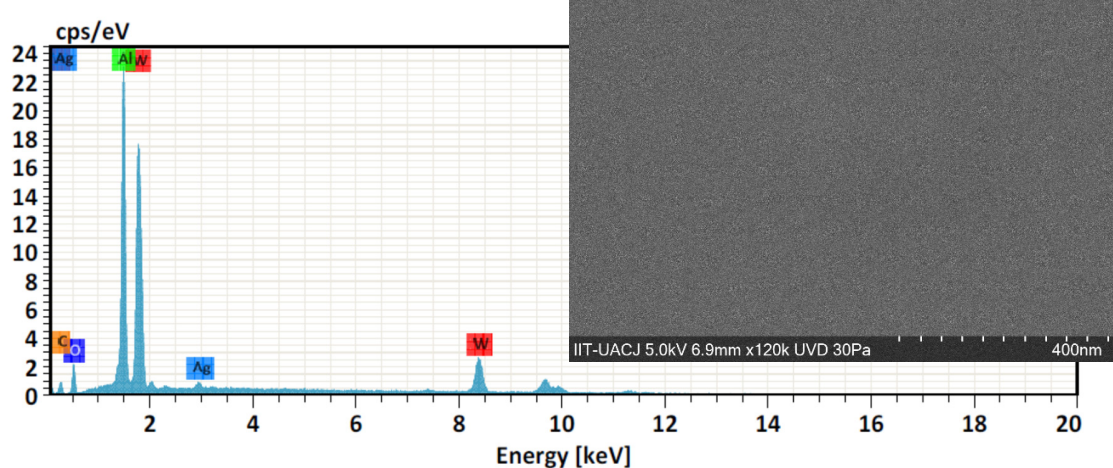

Figure S7. EDS and SEM for  $\text{WO}_3$  thin films a) as deposited and annealed at b) 400 °C and c) 500 °C. Red arrows show porosity on the film surface.

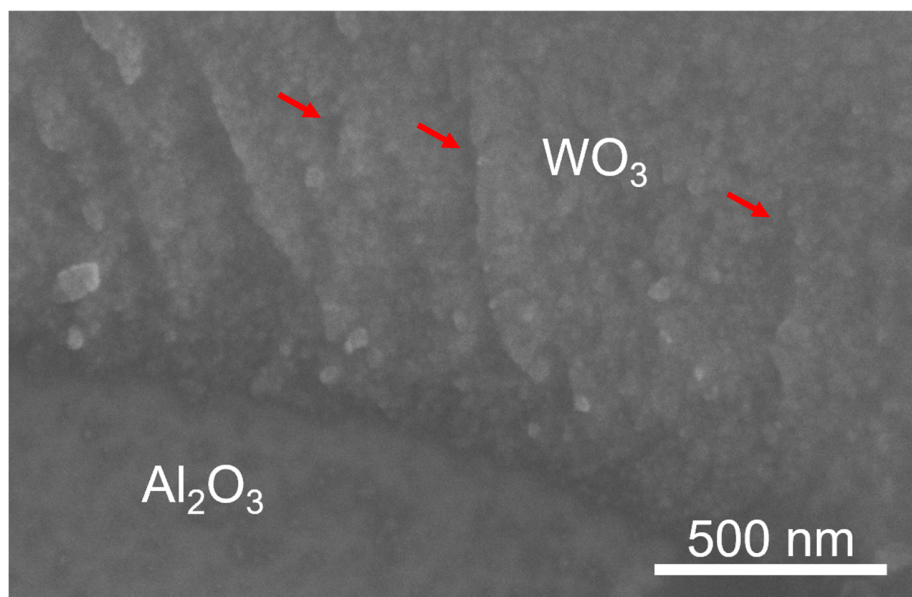

**Figure S8.** Cross-sectional SEM image of  $\text{WO}_3$  thin film annealed at 500 °C where is possible to see porosity within film as indicated by red arrows.

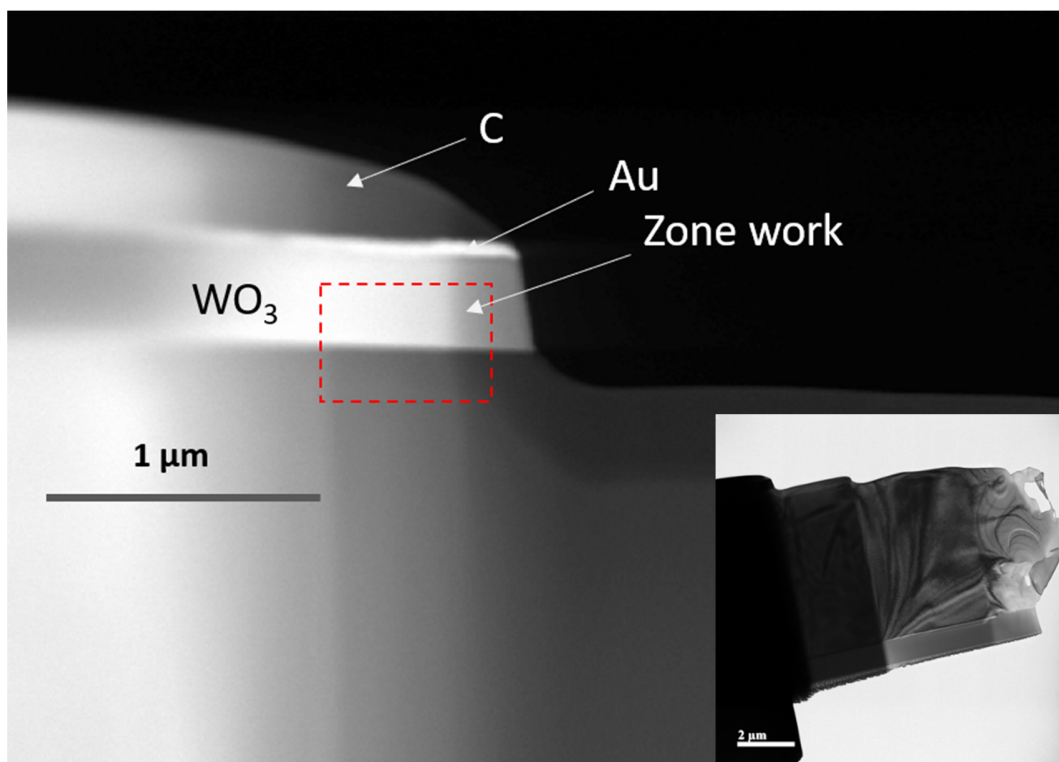

**Figure S9.** Lamella preparation sequence of images  $\text{WO}_3$  – 400 °C thin film for TEM measurements.

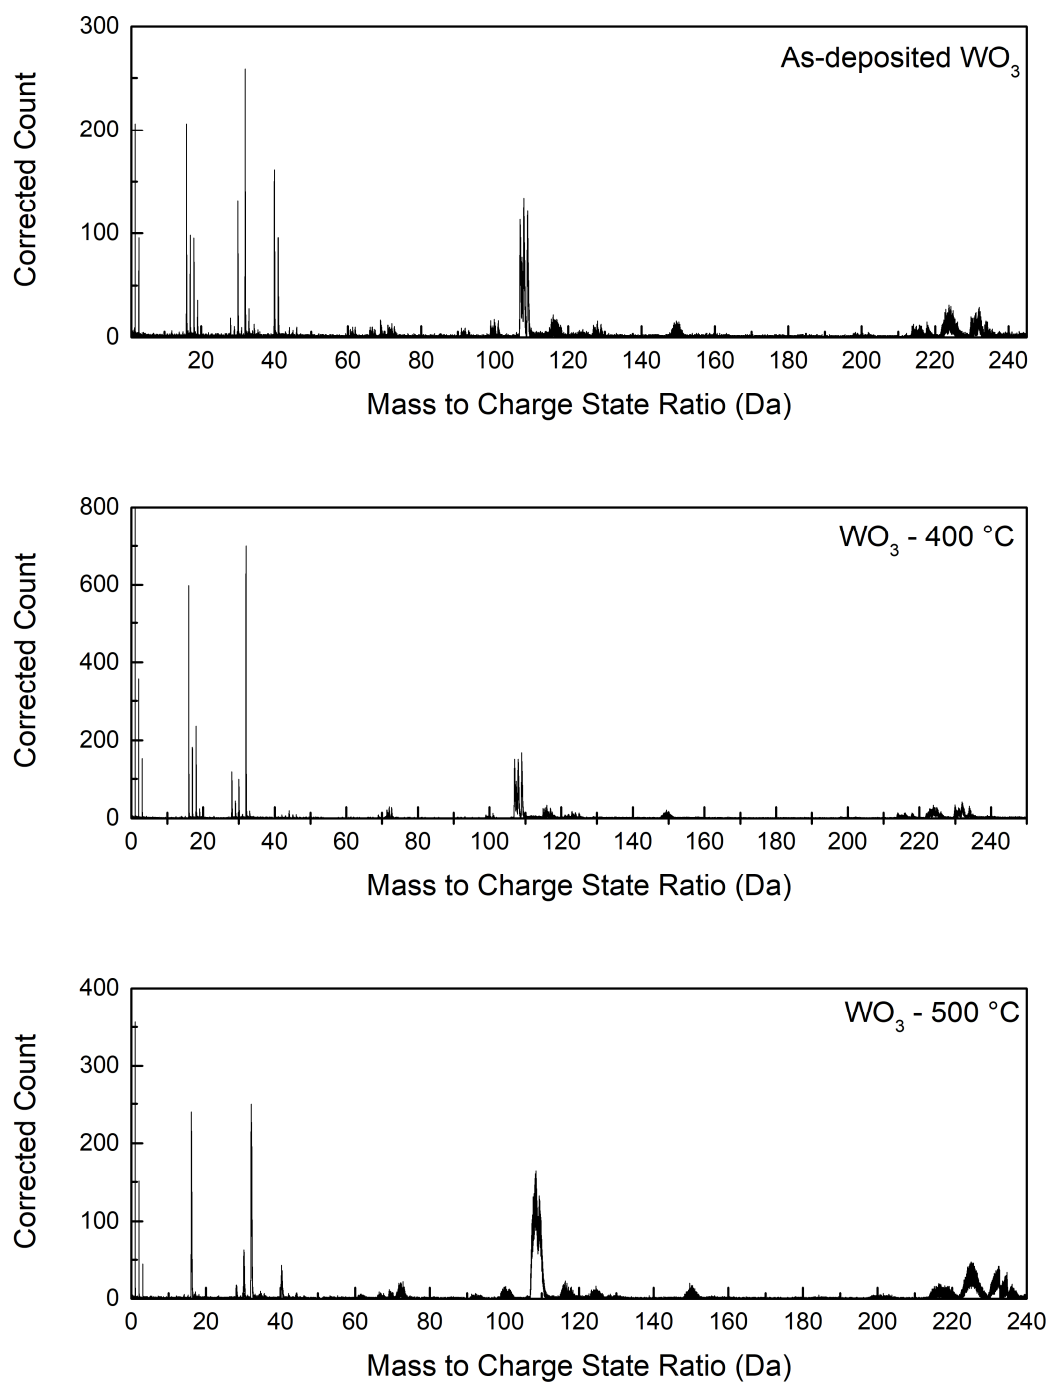

**Figure S10.** Mass spectra of  $\text{WO}_3$  thin films measured by APT, as deposited and processed at 400 °C and 500 °C.
